# Supplementary material for: Assessment of serum diagnostic biomarkers for periprosthetic joint infection in hip and knee arthroplasty: a retrospective study
Source: PeerJ. 2025 Nov 13;13:e20294. doi: 10.7717/peerj.20294 (PMC12619940; doi:10.7717/peerj.20294)
Supplement: Supplemental Information 1 [file peerj-13-20294-s001.xlsx]

## Sheet: Knee
Name	ID	Sex	Height	Weight	BMI	Age（Y）	Admission time	ASA	Renovation time（Y）	Preliminary diagnosis	Side	Diagnosis	WBC3.5-9.5	PLT125-350	Platelet volume0.108-0.282%	MPV7.6-13.2	CRP0-6	PCT0-0.05	ESR0-20	FIB2.08-3.85g/L	备注
		2	1.65	65	23.88	27	2014-10-03 11:46	2	5		2	infection	23.7	168	0.161	9.5	44.2		2	4.88
		2	1.55	75	31.22	55	2014-07-09 12:42	2	5		1	prosthetic loosening	4.49	243	0.26	10.5	0.2		2	2.44
		2	1.7	82	28.37	64	2014-05-05	3	0.583	rheumatoid	2	infection	4.74	265	0.234	8.1	35		15	3.88
		2	1.6	57	22.2656	64	2015-03-18	3	1.583		1	infection	5.6	279	0.261	9.4	13		65	4.52
		2	1.62	65	24.7676	68	2015-01-24	3	0.583	rheumatoid	1	infection	8.36	210		9.2	17	0.06	50	5.1
		2	1.65	86	31.5886	56	2015-01-28 08:44	3	0.167		1	high patellar joint tension/pain	7.27	253		8.5	7		22	2.86
		1	1.75	90	29.3878	84	2016-04-29	4	2.4		1	infection	9	194	0.141	7.3	61	0.113	44	4.3
		2	1.7	79	27.3356	62	2016-12-15	3	2		1	infection	5.4	274	0.17	6.2	32	0.524	34	4.6
		2	1.5	75	33.3333	58	2016-11-01 09:27	3	6.5		2	prosthetic loosening	8	431	0.43	10.1	3		76	2.7
		2	1.55	65	27.0552	80	2016-11-19 09:33	3	9		1	prosthetic loosening	5.7	252	0.183	7.3	7		25	4.8
		2	1.45	40	19.025	61	2016-07-27 17:01	2	10		2	infection	11.56	404			5		56	4.5
		1	1.7	55	19.0311	58	2016-06-02 10:05	2	2.167		1	infection	10.2	251	0.185	7.4	28	0.1	52	4.5	C.pelliculosa
		1	1.74	75	24.7721	61	2016-03-08 15:33	2	9		1	infection	8.88	127	0.14	11	220		54	6.1
		2	1.6	70	27.3437	61	2017-12-20 16:53	2	0.099		1	infection	9.3	284	0.28	9.9	18.42	0.057	19	5.2
		2	1.55	55	22.8928	75	2017-10-02 16:27	4	0.151	rheumatoid	1	infection	16.9	289	0.247	8.6	176.1	1.34	92	5.7	rheumatoid
		2	1.56	47	19.313	70	2017-08-29 14:55	3	0.066		2	infection	9.73	111	0.11	11	80.59	0.113	13	3.8	Pseudomonas aeruginosa
		1	1.66	77	27.9431	78	2017-08-18 10:38	3	0.917		2	infection	3.3	198	0.14	7.1	112	0.463	47	5.2
		2	1.49	65	29.278	66	2017-07-18 08:41	3	0.833		2	infection	9.7	349	0.246	7	14	0.211	31	4.6
		2	1.65	80	29.3848	60	2017-05-06 08:18	2	5		2	prosthetic loosening	4.81	271	0.27	9.8	3		6	3.4
		2	1.66	40	14.5159	54	2017-03-21 09:42	4	7	rheumatoid	2	infection	4.6	371	0.36	9.7	69.32		115	5.2	S.aureus
		1	1.73	91	30.4053	50	2018-12-04 08:30	2	0.5	unicompartmental knee arthroplasty	1	gasket out	7.33	298	0.27	9				2.7
		2	1.42	61	30.2519	62	2018-10-02 12:37	2	1		2	pain	6.07	217	0.22	10.1	1.88		16	3.6	D-D0.58，clean and unreplaced
		1	1.82	72	21.7365	64	2018-09-28 15:35	2	1.5		1	infection	8.16	351	0.34	9.7	110.79		58	7.8	infection after cruciate ligament reconstruction
		2	1.55	55	22.8928	68	2018-08-14 10:54	3	1		1	instability	5.3	168	0.155	9.2	0.1		11	3.2
		2	1.56	61	25.0657	71	2018-08-28 12:04	2	4		1	prosthetic loosening	4.57	245	0.25	10.1	5.23		11	3.8	*
		2	1.48	46	21.0007	59	2018-05-30 09:49	2	1.2		2	infection	6.5	278	0.33	8.8	20		20	5	infection，synovial membrane clearance,unreplaced
		2	1.55	50	20.8117	69	2018-04-14 14:29	2	2		1	infection	9.77	285	0.34	9.7	32		48	6.4	infection，sinus tract，unreplaced
		1	1.7	67.5	23.3564	76	2017-05-29	3	2	first infection	2	infection	6.34	264	0.26	9.8	3.64		11	4.9
		1	1.7	67.5	23.3564	76	2018-01-17 09:28:00	3	25 days	Infection after Revision Surgery	2	infection	7.81	363	0.33	9.2	56		54	6	candida、reinfection 25 days after revision
		1	1.7	75	25.9516	55	2018-02-02 09:36	2	0.583		2	infection	10.66	378	0.34	9	93.68	0.051	113	7.3	joint infection after acupuncture，unrenovated
		1	1.68	63	22.3214	73	2019-03-19 10:24	3	3		2	infection	6.6	401	0.265	6.6	117		59	7.6	S.aureus
		2	1.56	66	27.1203	77	2019-03-09 09:55	2	0.583		2	infection	7.95	400	0.44	11.1	19		61	4.4
		1	1.76	100	32.2831	64	2018-12-02	2	4	first infection	1	infection	4.96	299	0.28	9.2	53.45		80	6.1	D-D6.59，replacement gasket
		1	1.76	100	32.2831	64	2018-12-02	2	4 months	Infection after Revision Surgery	1	infection	3.66	217	0.22	9.9	6.02		18	4	removal of prosthesis
		2	1.46	75	35.1848	54	2017-12-06	2	3 months	first infection	2	infection	6	373	0.255	6.8	61		80	5	the gasket was revised 3 months after surgery ,MRSA
		2	1.46	75	35.1848	54	2018-09-25	2	9 months	Infection after Revision Surgery	2	infection、prosthetic loosening	6.1	323	0.308	9.5	12.38		39	4.1	the prosthesis was removed 9 months after the first revision
		2	1.46	75	35.1848	54	2021-07-20	2	3	infection after the second revision	2	infection	6.2	318	0.287	9	37.8		55	3.6	infection 3years after the second revision，Spacer Placement
		2	1.5	50	22.2222	51	2019-03-04 22:24	2	1	rheumatoid	1	periprosthesis fracture	9.85	343	0.32	9.5	4.06		75	3.5
		2	1.43	43	21.0279	66	2019-02-20 17:07	2	0.118	rheumatoid	2	infection	10.8	329	0.262	8	7		40	4.4	poor wound healing、gasket reconditioning
		1	1.78	84	26.5118	74	2019-04-22 14:29	2	0.833		1	infection	6.2	216	0.179	8.3	27		57	7	2019-03-03,the joint fluid bacteria cultured Finegoldia magna
		2	1.48	57	26.0226	63	2018-12-07	2	1	first infection	1	infection	8.55	331	0.31	9.5	159.38		100	7	infection 1 year after surgery，replacement gasket
		2	1.48	57	26.0226	63	2019-04-08	2	1	Infection 4 months after Revision Surgery	1	infection	6.44	398	0.38	9.5	159.38		130	4.7	post-revision infection，Spacer Placement
		1	1.65	77	28.2828	63	2019-04-15 08:04	2	3	unicompartmental knee arthroplasty	1	prosthetic loosening	8.32	323	0.32	10	7		77	3.9
		1	1.7	95	32.872	65	2019-10-08 09:58	2	1		2	infection	7.19	381	0.37	9.8	74	0.348	60	6.9	expectant treatment
		2	1.6	55	21.4844	67	2019-09-13 11:04	3	5		1	infection、prosthetic loosening	10.4	820	0.53	6.5	130		112	6.5	deep venous thrombosis
		1	1.67	83	29.7608	71	2019-09-22 08:39	3	0.917		1	joint instability	6.71	181	0.19	10.7	8		14	3.3
		2	1.5	55	24.4444	72	2019-07-23 08:28	2	1.333		2	pain	4.71	230	0.24	10.4	<1		47	3.7
		2	1.55	76	31.6337	70	2019-05-12 08:51	3	12		1	prosthetic loosening	6.35	424	0.43	10.1	9		36	3.7
		2	175	75	24.49	60	2019-11-25 10:31	2	1.16		1	pain	5.32	252	0.27	10.8	0.95			2.9	patellar resurfacing
		2	154	82	34.56	79	2019-11-06 10:16	3	0.0219		1	prosthesis dislocation	9.94	175	0.19	10.7	0
		2	165	75	27.55	67	2020-01-31 23:00	2	0.0493		1	pain	5.76	269	0.26	9.7	2.38	0.04	31		expectant treatment
		1	165	55	20.2	69	2020-03-20 11:46	2	1		2	periprosthesis fracture	5.71	192	0.18	9.2	33.86		15	4.2
		2	155	60	24.97	62	2020-11-09 11:41	2	0.5833		2	infection	4.4	552	0.414	7.5	72.7		93	5
		1	167	65	23.31	78	2020-10-10 09:53	3	6		1	infection、prosthetic loosening	10.7	477	0.367	7.7	40.5		71	4.6
		1	162	85	32.39	60	2020-03-10 18:44	3	3		1	periprosthesis fracture	5.35	188	0.18	9.4	4.63		15	3.5
		2	152	35	15.15	61	2020-01-05 10:37	3	0.0833	rheumatoid	2	infection	9.88	425	0.39	9.2	24.37		64	4.8
		2	158	65	26.04	73	2020-06-30 09:24	2	8		1	prosthetic loosening	5.1	169	0.133	7.8	0.6		10	3
		1	174	74	24.44	67	2020-04-05 08:55	2	1.5		1	infection	11.65	455	0.42	9.2	29		91	6.5	S.aureus
		1	170	64	22.15	54	2020-05-01 09:55	2	1		1	gasket out	162	234	0.27	11.4				3.2
		2	150	62	27.56	66	2020-04-24 09:22	3	1		2	infection、pain	6.76	270	0.26	9.7	52		54	5.5
		2	150	58.5	26	76	2020-06-10 09:38	3	2		2	infection	8.49	270	0.25	9.4	22.25	0.179	50	4.3	clean and unreplaced
		2	160	95	37.11	63	2020-08-04 10:22	3	4		1	prosthetic loosening	10.1	316	0.268	8.5	10.9		26	3.7
		1	167	61	21.87	72	2020-08-01 11:46	2	3		2	pain，synovitis、gasket wear	10.8	233	0.175	7.5	1.3		6	3.3
		1	175	87	28.41	75	2020-07-16 08:28	3	1.25		2	synovitis，gasket replacement	4.14	163	0.18	11.1	2		31	2.8
		1	165	55	20.2	69	2020-03-20 11:46	2	12 days		2	periprosthesis fracture	5.71	192	0.18	9.2	33.86		15	4.2
		2	155	84	34.96	64	2020-11-09 12:50	3	0.041		1	infection（gasket replacement）	8.6	407	0.403	9.9	6			2.5	poor wound healing、gasket reconditioning
		2	155	77	32.05	78	2020-11-16 09:24:00	3	10		1	prosthetic loosening	4.65	241	0.23	9.7	5		17	3.2.
		2	160	55	21.48	67	2020-01-06 10:06:00	2	5		1	infection，prosthetic loosening	10.4	820	0.53	6.5	130		112	6.5
		2	155	70	29.14	68	2021-06-10 16:29	2	0.666		1	infection，prosthetic loosening	28.41	305	0.3	9.9	95	2.38	22	6.3	S.dysgalactiae equisimilis
		2	155	57	22.48	64	2021-08-03 10:27	2	3		1	pain	5.1	208	0.176	8.4	3.2		10	2.7	postoperative joint stiffness
		2	156	65	26.71	64	2021-06-17 11:56	2	7		2	prosthetic loosening，polyethylene wear	7.3	344	0.239	6.9	6.3			3.6
		2	160	65	25.39	75	2021-07-14 10:28	3	3		2	prosthetic loosening，gasket wear	5.58	209	0.23	11.1	5		14	2.2
		1	170	84	29.07	75	2021-05-19 08:57	3	10		1	prosthetic loosening	7	193	0.19	9.8	<1		9	3.4
		1	168	90	31.89	70	2021-04-11 10:12	2	13		2	prosthetic loosening	8.12	235	0.25	10.8	4.24		14	3.5
		1	167	65	23.31	78	2021-05-30 10:50	3	6		1	infection、prosthetic loosening	10.7	477	0.367	7.7	40.5		71	4.6
		2	152	61	26.4	63	2021-05-12 10:02	2	11		1	prosthetic loosening	5	268	0.228	8.5	4.4		21	2.6
		2	166	80	29.03	68	2021-05-30 10:46	3	1		2	pain	9.5	279	0.231	8.3	8		64	3.4
		2	160	63	24.61	67	2021-01-03 11:03:00	2	0.333		2	infection	11.8	293	0.227	7.7	30.8		33	4
		2	160	80	31.25	68	2021-07-16 12:53	2	0.0833		2	infection（gasket replacement）	7.88	369	0.32	8.7	33.59	0.097	22		poor wound healing
		2	150	65	28.89	71	2021-01-21 12:00:00	3	0.5833		1	infection	5.18	253	0.24	9.5	16.6		59	3.8
		2	160	68	26.56	77	2021-08-17 11:37	4	0.333		1	pain	6.82	227	0.198	8.7	3.85	0.04	64	3.4
		2	160	51	19.92	81	2021-10-17 12:51	2	3		2	prosthetic loosening	5.8	376	0.316	8.4	8.49	0.081	42	3.1
		1	165	67	24.61	67	2021-10-05 12:44	2	0.5833		1	infection	5.26	314	0.3	9.6	30.01		56	3.9
		2	162	76	32.89	63	2021-09-10 10:53	2	1	unicompartmental knee arthroplasty	1	prosthetic loosening	6.59	255	0.233	9.1	2.75		6	2.2
		1	166	84	30.48	72	2021-10-19 12:11	2	0.5833		2	infection	9.6	341	0.21	6.2	75.2	<0.02	108	3.9
		1	170	80	27.68	73	2021-09-20 13:51	3	2		1	infection	9.23	288	0.27	9.3	66.78		123	4.6
		2	154	70	29.52	57	2021-10-14 11:39	2	2	unicompartmental knee arthroplasty	1	gasket out，prosthetic loosening	5.26	328	0.286	8.7	4.67		12	3.2
		2	155	58.5	24.35	69	2021-06-30 20:33	3	6	rheumatoid	1	infection	6.6	406	0.325	8	36.8		90	4.6	expectant treatment
		2	162	84	32	79	2021-05-11 13:49	2	0.4166		1	pain									expectant treatment
		2	160	65	25.39	75	2021-05-11 15:21	3	1.583		2	pain	6.08	304	0.31	10.1	1.65		11	3.4	arthroscopic debridement
		2	155	49	20.4	63	2021-06-20 08:54	2	0.4166		2	infection	6.32	369	0.35	9.4	99.95		49	4.9	D-D 0.99，expectant treatment
		2	159	63	24.92	69	2021-07-16 11:50	2	3		2	infection	6.1	305	0.267	8.8	24.8		31	4
		2	150	52	23.11	65	2021-11-11 11:31	2	0.166		1	pain	7.41	314	0.281	9	2.47	0.04	17	3.7
		2	155	71	29.55	60	2021-11-14 10:56	2	0.03287		1	infection（gasket replacement）	10.97	334	0.309	9.2	341.63	0.252	88	9.9	poor wound healing，S.aureus，Gram-positive cocci（less）
		2	160	70		72	2021-12-27 18:36	2	1		1	infection	4.23	137	0.136	9.9	63.04	0.069	38	4.7
		2	168	60		57	2021-12-27 12:06	3	33 days		2	poor wound healing	5.59	266	0.235	8.8	5.64	0.036	33	3.7
		2	153	62		59	2021-12-13 12:01	2	10 months		1	infection	7.58	343	0.289	8.4	9.16	0.022	55	5.2
Complication
							2021-12-08 18:35					joint infection not replaced
												joint infection not replaced
												joint infection not replaced
							2021-07-27 11:47					poor function after arthroscopy									poor function after arthroscopy
							2021-10-26 19:33					poor wound healing									poor wound healing
							2021-11-06 11:53					poor wound healing
		1	173	86.5		61	2020-01-20 12:34	3	0.0833		2	poor wound healing	7.3	222	0.184	8.3	1.3			2.3	debridement
		2	160	50		46	2020-04-12 08:10	3	0.333	rheumatoid	1	poor wound healing	10.18	466	0.48	10.3	32.65		31	4.3	S.aureus
		2	157	67		65	2020-11-03 11:41	2	0.0833		2	joint dysfunction
		2	155	70		61	2020-12-29 11:54	2	0.166		2	ankylosis									surgical release
		2	159	70		65	2021-03-24 10:50	2	0.9166		1	ankylosis	5.7	293	0.255	8.7	4		48
		2	160	80		68	2021-01-18 14:24	3	0.0493		2	poor wound healing	5.5	297	0.303	10.2	1.5		10		Staphylococcus haemolyticus
		1	160	60		52	2021-03-04 12:11	2	0.25		2	ankylosis	6.83	297	0.3	10.2	<1			2.6	surgical release
		2	158	73		67	2021-02-01 14:09	2	0.1666		2	poor wound healing	5.4	269	0.192	7.1	4.4	0.028	31	3.1	debridement
		1	155	70		53	2021-01-23 11:50	2	0.1666	necrosis	2	poor wound healing	5.7	382	0.265	6.9	21.4		67	4.4	knot reaction？Superficial infection？After hip replacement
		2	160	70		62	2021-06-15 11:35		0.25		3	joint dysfunction
		2	158	55		64	2021-05-03 12:17		0.25		3	joint dysfunction
		2	158	60		65	2021-08-06 08:47	2	0.5		1	joint dysfunction	5.16	213	0.2	9.2	1.29		10	3	surgical release
		2	152	63		59	2021-07-30 13:52	2	0.1808	rheumatoid	2	poor wound healing	4.53	292	0.25	8.7	18.88	0.013	81	3.8	debridement
		2	155	56		61	2021-11-09 13:08	2	0.25		2	joint dysfunction	3.03	207	0.231	11.2	3.42	0.124	11	3.5	surgical release
		2	158	66		63	2021-11-01 12:53	2	0.1666		1	poor wound healing	5.07	222	0.2	9	0.56		17	4.1	S.aureus，Enterococcus faecalis
		1	165	67	24.61	59	2020-08-22 16:12	2	0.916		1	osteotomy infection	9.09	278	0.26	9.4	32.25		50	4.6
		2	155	40	16.65	78	2020-06-02 11:50	3	0.4166		2	infection	6.6	402	0.38	9.5	47.16	0.04	112	6.4	had a joint puncture，right knee infection？，unreplaced，D-D6.25
		2	154	64	26.99	68	2020-05-09 09:12	2	0.0575		1	pain									symptomatic treatment
		2	160	60	23.44	70	2020-06-30 15:57	3	0.0833		2	pain	5.13	231	0.21	9.1	<1	0.01	10		symptomatic treatment
		1	170	62	21.45	84	2021-08-02 14:40	3	0.08767		1	infection ?	5.8	182	0.147	8.1	29.2	0.04	15	3.1	metal allergy（expectant treatment）

## Sheet: Hip
Name	ID	Sex	Height	Weight	BMI	Age（Y）	Admission time	ASA	Renovation time（Y）	Preliminary diagnosis	Side	Diagnosis	WBC	PLT	Platelet volume	MPV	CPR	ESR0-15	FIB2-4g/L
		1	1.74	76	25.1024	64	2014-01-01 09:50	2	3	femoral neck fracture	1	Periprosthesis fracture	5.59	156	0.16	10.1	18.85	3	3.8	expectant treatment
		2	1.6	58	22.6562	74	2014-03-17 09:08	3	4	femoral neck fracture	2	prosthetic loosening	6.61	241	0.27	11.1	0.5	6	2.22
		1				38	2014-02-25 12:08	2	2	femoral head necrosis	2	infection/prosthetic loosening	6.66	348	0.31	8.8	60	85	4.64
		1				46	2014-03-04 08:52	3	12	AS,femoral head necrosis	1	prosthetic loosening	4.07	176	0.18	10.2	7.69	35	3.5	bone cement
		1				66	2014-06-03	2	13	femoral head necrosis	1	prosthetic loosening	5.03	162	0.13	7.9	1.7	3	2.87
		2				70	2014-09-27 03:11	3	4	femoral head necrosis	2	dislocation	6.11	123	0.15	12.1	1.19	7	3.07
		2				82	2014-07-15 08:32	3	0.333	femoral neck fracture	2	bone cement free body	7.07	264	0.27	10.4	1.31	13	2.95
		1				80	2014-07-30 10:27	3	17 days	femoral neck fracture	1	infection	9.42	325	0.35	10.9	83	56	5.29	expectant treatment
		2				77	2014-08-24 09:50	3	1 months	femoral head necrosis	1	dislocation	7.17	322	0.29	8.9		12	4.83	manual reduction
		1				66		2	4	femoral neck fracture	2	prosthetic loosening	7.97	177	0.17	9.5	5.37	16	3.13	bone cement
		2				63		2	3	femoral neck fracture	1	dislocation	11.56	234	0.22	9.3			3.2
		2				69	2014-07-23 08:29	2	10	femoral neck fracture	1	prosthetic loosening	4.62	257	0.27	10.5	2.81	28	3.42
		2	1.67	65	23.3067	88	2015-06-07	3	0.066	femoral neck fracture	2	infection	3.63	245	0.25	10.1	94.94	37	5	D-D 2.77，staphylococcus haemolyticus
		1	1.7	80	27.6817	72	2015-02-06	2	1	femoral head necrosis	2	infection	4.62	177	0.12	9.6		55	4.52	coxotuberculosis
		2	1.58	70	28.0404	79		3	11	femoral head necrosis	2	Periprosthesis fracture	11.97	242	0.25	10.3			3.37	bone cement B3
		2	1.54	63	26.5643	59	2015-05-30 10:03	2	7	femoral head necrosis	2	prosthetic loosening	5.8	216	0.219	10.1	1.5	7	2.8
		1	1.7	72	24.9135	65	2015-04-22 10:04	2	0.667	femoral head necrosis	2	acetabular abrasion	8.6	289	0.276	9.6	6	42	3.51
		1	1.73	70	23.3887	61	2015-06-07 10:20	2	5	femoral neck fracture	1	Periprosthesis fracture	6.61	166	0.15	9.3			2.3
		1	1.7	95	32.872	71	2015-05-19 12:20	3	8	femoral head necrosis	1	prosthetic loosening	6.78	216	0.142	9.1	5	5	2.5
		2	1.5	47.5	21.1111	63	2015-09-23 19:36	2	1	femoral head necrosis	2	Periprosthesis fracture	5.4	360	0.257	6.8	15	12	3.8	D-D2.55,after knee replacement
		2	1.58	52.5	21.0303	26	2015-09-12 10:43	1	11	femoral head necrosis	2	lining wear	3.8	181	0.154	8.5	5	13	3.1
		2	1.55	65	27.0552	57	2015-11-30	2	13	femoral head necrosis	1	lining wear/acetabular loosening	5.4	247	0.181	7.3	1	20	3.5
		2	1.63	73	27.4756	59	2016-02-25 10:05	3	10	pain	2	prosthetic loosening	5.1	283	0.214	7.6	4	48	3.8
		1	1.62	59	22.4813	75	2016-05-05 11:56	2	2	femoral head necrosis	1	infection	6.5	292	0.3	10.4	26	38	5	infection of joint
		1	1.75	68	22.2041	76	2016-02-29 15:49	2	0.041	femoral neck fracture	1	Periprosthesis fracture	6.1	407	0.4	9.7	22.51	120	5.8
		2	1.61	92	35.4925	63	2016-03-01 09:38	3	19	femoral head necrosis	1	prosthetic loosening	5.02	193	0.22	11.5	10.66	18	3.9
		2	1.45	40	19.025	61	2016-02-26 10:10	3	10	pain	2	infection/prosthetic loosening	11.56	404	0.41	10.1	11.56	56	4.5
		1	1.8	78	24.0741	48	2016-05-18 09:52	3	12	AS,femoral head necrosis	1	osteolysis/prosthetic loosening	4.5	172	0.153	8.9	18	10	3.4
		1	1.5	48	21.3333	73	2016-05-11 09:49	2	20	femoral head necrosis	1	prosthetic loosening，fracture	6.34	303	0.28	9.3	18	74	4.8
		1	1.68	77	27.2817	37	2016-04-21 09:26	2	14	femoral head necrosis	1	osteolysis	7.3	328	257	7.8	20	40	5
		1	1.71	90	30.7787	70	2016-06-12 13:41	3	0.167	femoral head necrosis	2	Periprosthesis fracture	6.08	176	0.19	10.7	14.38	12	3
		2	1.55	56	23.3091	65	2016-06-19 11:15	2	0.75	femoral neck fracture	2	prosthetic loosening	5.88	440	0.44	10	20.25	97	4.9
		2	1.52	51	22.0741	58	2016-09-26 08:51	2	18	femoral head necrosis	1	prosthetic loosening	6.65	335	0.37	10.9	2	24	3.7	bone cement
		1	1.6	82	32.0312	73	2016-09-18 10:16	3	18	femoral head necrosis	1	prosthetic loosening	5.7	188	0.154	8.2	1	5	2.3
		1	1.65	68	24.977	61	2016-10-09 09:16	2	16	femoral neck fracture	1	prosthetic loosening	3.52	193	0.2	10.2	0.23	4	2.6
		1	1.73	81	27.0641	68	2016-11-01 08:32	4	0.667	femoral head necrosis	1	prosthetic loosening	6.98	149	0.17	11.6	10	26	3.7
		2	1.52	55	23.8054	71	2016-11-22 10:30	2	10	femoral head necrosis	2	prosthetic loosening	4.8	275	0.198	7.2	7	41	5.2
		1	1.72	76	25.6896	74	2016-12-05 09:31	3	9	femoral head necrosis	1	prosthetic loosening	6.67	163	0.18	11	2.15	8	3.2
		1	1.75	68	22.2041	76	2016-11-30 16:55	2	15	femoral neck fracture	1	Periprosthesis fracture	6.74	121	14	11.7	0.9	2	2.6	bone cement
		1	1.72	85	28.7317	43	2017-02-22 11:43	3	2.2	femoral head necrosis	2	infection	8.25	296	0.27	9.3	7	15	3.8	hypovirulent infection？
		2	1.52	72	31.1634	71	2017-03-21 08:57	3	9	femoral head necrosis	1	prosthetic loosening	4.83	222	0.24	10.7	3	8	3.4
		2	1.55	64	26.6389	61	2017-03-07 11:05	2	10	femoral head necrosis	2	prosthetic loosening	7.55	237	0.25	10.7	5	29	4.1	screw break,rheumatoid
		2	1.55	64	26.6389	61	2017-05-06	2	10.167		1	prosthetic loosening	7.7	134	0.28	11.2	6	24	3.4
		2	1.55	40	16.6493	85	2017-02-20	3	0.074	femoral neck fracture	2	Periprosthesis fracture	10.77	433	0.34	10.3			3.9	osteoporosis,cerebral infarction,hemipleia
		1	1.7	65.5	22.6644	63	2017-03-05	3	10	femoral head necrosis	1	prosthetic loosening	8.27	252	0.32	11.5	6	10	4.8	rheumatoid
		1	1.7	65.5	22.6644	63	2017-04-29 10:18:00	3	10.167		1	prosthetic loosening	5.87	285	0.32	11.1	＜1	12	3.8
		2	1.7	54	18.6851	68	2017-05-05 20:01	3	6	femoral head necrosis	1	prosthetic loosening	5.09	235	0.26	11	7.17	31	4.8
		2	1.56	61	25.0657	80	2017-04-14 10:01	2	1	femoral head necrosis	2	prosthetic loosening	6.5	276	0.22	8	1	2	2.7
		1	1.67	71	25.4581	51	2017-06-16 11:39	1	10	femoral head necrosis	2	infection	8.46	298	0.27	9.1	11	16	4.8	prosthetic loosening,3months
		2	1.6	53.6	20.9375	63	2017-05-28 08:24	2	6	femoral neck fracture	2	prosthetic loosening	5	125	0.113	9.2	0	11	3
		2	1.42	44	21.8211	70	2017-05-16 07:58	2	6	femoral neck fracture	1	prosthetic loosening	5.12	109	0.13	11.7	<1	21	3.6
		2	1.55	53	22.0604	69	2017-04-11 09:35	2	15	femoral head necrosis	1	infection	7.49	252	0.34	9.7	57	50	5.2	escherichia coli,4 months
		1	1.72	76.5	25.8586	65	2017-05-03 11:06	2	6	femoral head necrosis	1	prosthetic loosening	7	269	0.187	7	2	13	2.6	bone cement
		2	1.55	65	27.0552	67	2017-04-27 10:16	2	9	femoral neck fracture	2	prosthetic loosening	4.33	252	0.29	11.5	<1	5	2.7	bolt loose
		1	1.66	57	20.6852	55	2017-08-01 09:35	2	11	femoral head necrosis	2	prosthetic loosening	5.83	167	0.18	10.9	<1	2	2.8
		2	1.58	60	24.0346	61	2017-08-19 08:15	3	9	femoral head necrosis	2	lining wear	6.28	266	0.3	11.4	9	10	3.1
		2	1.6	58	22.6562	63	2017-07-22 09:52	2	16	femoral neck fracture	1	prosthetic loosening	4.4	341	0.247	7.3	2	19	3.4	bone cement
		2	1.46	53	24.864	78	2017-12-09 11:14	3	4	femoral neck fracture	1	Periprosthesis fracture	10.2	414	0.38	9.2	0.8	24	3.2	bone cement
		2	1.52	55	23.8054	63	2017-10-13 16:04	2	7	femoral neck fracture	1	prosthetic loosening	5.54	201	0.19	9.3	6.65	5	3.4	expectant treatment
		1	1.73	84	28.0664	68	2017-10-31 10:45	2	9	femoral neck fracture	1	prosthetic loosening	6.3	224	0.19	8.5	4	4	2.5	bone cement
		1	1.75	85	27.7551	70	2017-11-06 10:14	4	20	femoral head necrosis	2	Periprosthesis fracture	9.87	478	0.45	9.2	22	30	3.8
									0.125			dislocation after revision	9.87	478	0.41	8.6	61
		1	1.67	70	25.0995	53	2017-12-29 12:10	3	1	femoral neck fracture	2	Periprosthesis fracture	8.15	282	0.29	10.1			6.8	D-D 5.45
		1	1.68	45	15.9439	79	2018-03-08 10:26	4	0.167	femoral neck fracture	2	infection	5.2	405	0.38	9.4	46	53	5.8	Enterobacter cloacae,poor wound healing，expectant treatment
		1	1.53	63	26.9127	50	2018-03-28 10:04:00	3	15	AS,osteoarthritis	2	prosthetic loosening	8.73	198	0.22	11.3	<1	13	3.5
		1	1.6	68	26.5625	58	2018-05-12 10:09	3	22	AS/femoral head necrosis	1	prosthetic loosening	6.91	226	0.25	11	2	4	2.9
		2	1.6	76	29.6875	61	2018-04-07 09:25	2	10	femoral head necrosis	1	prosthetic loosening	5.63	294	0.31	10.6	5	8	3
		2	1.54	57	24.0344	74	2018-06-09 10:39	3	9	femoral neck fracture	2	infection	4.8	206	0.153	7.4	9	15	4.5	PCT 0.044
		1	1.65	61	22.4059	50	2018-04-27 08:21	1	1	femoral head necrosis	1	infection	6.98	339	0.34	10	12.51	9	4	sinus tract
		2	1.62	76	28.959	77	2018-05-10 08:59	3	9	femoral neck fracture	2	prosthetic loosening	5.12	231	0.25	11	6	14	3.7
		2	1.51	72	31.5776	76	2018-06-25 10:05	3	10	femoral head necrosis	1	prosthetic loosening	4.48	224	0.25	11.1	3	21	3
		1	1.71	63	21.5451	59	2018-06-13 12:39	2	15	femoral head necrosis	2	prosthetic loosening	6.8	210	0.235	11.2	0.1	2	2.8
		1	1.68	60	21.2585	74	2018-07-25 07:16	4	0.25	depression/femoral head necrosis	2	dislocation	1.45	283	0.28	9.7	24.62	3	2.9	leukopenia
									15 days			redislocation	2.8	238	0.167	7	9.2
		2	1.56	58	23.833	60	2018-07-28 09:01	3	7	femoral neck fracture	1	prosthetic loosening	6	259	0.207	8	4	5	3.5
		1	1.76	60	19.3698	51	2018-07-13 11:14	2	10	femoral head necrosis	1	prosthetic loosening	6.49	246	0.26	10.6	1.14	4	3.5
		1	1.65	55	20.202	69	2018-07-24 09:06	2	8	femoral head necrosis	1	prosthetic loosening	5.71	206	0.23	11.4	<1	2	2.7
		1	1.7	71	24.5675	48	2018-10-12 10:10:00	2	10	femoral head necrosis	2	prosthetic loosening	7.5	176	0.168	9.5	3	4	2.3
		1	1.6	69	26.9531	63	2018-12-12 10:12	2	25	femoral head necrosis	1	Periprosthesis fracture/prosthetic loosening	8.36	242	0.2	8.3	6	25	3.5
		1	1.72	84	28.3937	49	2018-12-16 16:46	3	12	femoral head necrosis	2	prosthetic loosening	7.34	191	0.18	9.4	36.38	39	3.7
		1	1.55	52	21.6441	42	2018-12-11 10:17	3	12	AS,femoral head necrosis	1	prosthetic loosening	6	149	0.133	9	6	9	3.5
		1	1.68	60	21.2585	63	2018-11-13 10:08	2	30	femoral head necrosis	1	prosthetic loosening	4.8	223	0.218	9.8	0	10	3
		1	1.6	62	24.2187	61	2019-02-27 14:51	2	6	femoral head necrosis	1	prosthetic loosening/infection	6.73	405	0.37	9.1	23	68	6	PCT 0.01
		1	1.68	79	27.9904	53	2019-01-05 10:28	3	3		1	prosthetic loosening	11.23	342	0.36	10.5	11	15	4	18 years after revision, due to loosening of the prosthesis, pain for 6 years, revision was performed
		1	1.7	80	27.6817	67	2019-03-05 10:42	2	1.25	femoral head necrosis	1	prosthetic loosening	7.19	204	0.22	10.6	7.32	14	3	PCT 0.164
		1	1.78	100	31.5617	73	2019-03-28 08:37	2	9	dislocation of hip joint	2	infection	5.94	267	0.25	9.4	2.04	6	2.9
		1	1.68	66	23.3844	52	2019-03-22 10:27	1	12	femoral head necrosis	1	prosthetic loosening	4.5	147	0.15	10.1	6	39	3.4
		1	1.74	87	28.7356	75	2019-05-23 10:20	3	11	femoral head necrosis	1	prosthetic loosening	5.8	179	0.15	8.4	3.1	10	3.6	First renovation
							2019-11-12	3				pain	6.41	208	0.21	10.5	14.5	47.72	4.1	5 months after revision/expectant treatment
							2019-12-10	3				prosthetic loosening	6.2	178	0.173	9.7	14.5	14	3.9	6 months after revision/Third hospitalization renovation
		2	1.55	60	24.974	69	2019-06-01 11:26	3	15	femoral head necrosis	2	infection	6.19	292	0.26	9	49.09	18	6.3
		2	1.57	41	16.6335	66	2019-05-27 09:27	3	1.5	femoral head necrosis	2	prosthetic loosening	6.1	297	0.29	9.7	24.99	101	6.2	osteoporosis，pathological fracture，expectant treatment
		2	1.57	41	16.6335	66	2019-08-20	3	1.8		2	infection	7.5	252	0.25	9.7	49	104	6.9
		1	1.79	75	23.4075	58	2019-06-17 09:05	3	18	femoral head necrosis	2	prosthetic loosening	6.34	200	0.19	9.7	6	26	3.1	bone cement
		1	1.63	71	26.7229	63	2019-06-10 10:59	3	14	femoral head necrosis	2	prosthetic loosening	8.63	276	0.25	9.1	18.09	31	4.9
		1	1.7	62	21.4533	63	2019-04-09 11:05	2	0.167	femoral head necrosis	1	infection	7.19	437	0.43	9.9		54	6.3
		2	1.52	65	28.1337	48	2019-03-22 09:07	3	1	dislocation of hip joint	1	nonunion	4.5	159	0.23	14.7	2	28	3.5
		2	1.5	60	26.6667	75	2019-03-31 14:49	3	4	-	2	Periprosthesis fracture	5.79	213	0.23	10.9	11.4	22	3.6	fracture of acetabulum
		2	1.65	75	27.5482	57	2019-10-01 08:44	3	7	femoral neck fracture	1	prosthetic loosening	5.83	280	0.28	9.9	＜1	36	3.1
		1	1.65	65	23.8751	48	2019-10-24 10:38	1	6	femoral head necrosis	1	prosthesis ruptyre	10.06	251	0.26	10.4	50.47	21	4.8
		1	1.65	70	25.7117	51	2019-10-30 08:42	1	13	femoral head necrosis	2	prosthetic loosening	8.46	312	0.29	9.3	＜1	10	2.9
		1	1.7	70	24.2215	67	2019-08-03 09:34	3	9	femoral head necrosis	1	prosthetic loosening	7.56	199	0.2	10	＜1	14	2.9	15 years ago due to necrosis of the femoral head replacement surgery, 9 years ago, is now renovated again
		1	1.7	60	20.7612	66	2019-08-18 22:38	3	20	femoral head necrosis	1	Periprosthesis fracture	7.4	229	0.155	6.8	8	13	3.3	PCT 0.045
		1	1.65	50	18.3655	61	2019-07-13 11:31	3	0.083	femoral head necrosis	2	infection	6.1	312	0.198	6.3	5	19	3.5	D-D1.17
		2	1.6	52	20.3125	56	2019-07-18 11:11	1	8	femoral head necrosis	1	prosthetic loosening	5.8	256	0.174	6.8	8.5	35	4
		2	1.52	65	28.1337	48	2019-03-22 09:07	2	1	DDH	1	prosthetic loosening	4.5	159	0.23	14.7	2	28	3.5	Femoral nonunion after hip replacement
		2	162	45		71	2019-12-07 10:06	2	7	femoral neck fracture	1	Periprosthesis fracture	5.66	251	0.26	10.3	54	95	6.6
		2	150	87		48	2019-11-19 12:35	3	11 months	femoral neck fracture	1	prosthesis dislocation	7.09	317	0.3	9.5	9.13	15	2.6	prosthesis dislocation
		1	170	67.5		64	2019-11-25 10:37	2	20	femoral neck fracture	2	prosthetic loosening	5.5	249	0.25	10.2	2.39	15	3
		1	170	78		57	2019-11-30 09:46	2	20	femoral head necrosis	2	prosthetic loosening	7.29	169	0.15	9	6	21	3.3
		2	146	53		71	2019-11-30 10:06	2	8	femoral head necrosis	2	prosthetic loosening	8.75	259	0.27	10.3	5	34	3.5	Second renovation
							2013-06-29	2	2		2	prosthetic loosening	6.7	276	0.29	10.6	3	34	3.88	First renovation
		2	152	61		54	2019-12-18	2	4	DDH	2	nonunion	4.7	233	0.25	10.6	1.72	11	2.5	The fracture at the right femoral intercept is nonunion
		1	178	88		70	2019-11-08 09:33	3	15	femoral neck fracture	2	prosthetic loosening	8.02	323	0.31	9.5	4	28	3.2
		1	150	54		72	2020-01-29 09:51	3	10	femoral neck fracture	1	prosthetic loosening	6.9	295	0.233	7.9	0.2	9	3.2
		1	168	70		69	2020-03-30 12:04	3	7	femoral neck fracture	2	infection、prosthetic loosening	15.4	205	0.202	9.9	192.1	80	6.5	D-D 2.19
		1	173	70		68	2020-01-31 12:10	3	0.3	femoral head necrosis	1	infection	5.88	463	0.32	6.9	17.5	24	4
		2	155	67		78	2020-03-10 15:31	3	10	femoral neck fracture	1	prosthetic loosening	6.86	269	0.3	10.6	1.62	11	3.5
		1	168	65		50	2020-03-26 08:22	3	27	femoral head necrosis	1	prosthetic loosening	6.4	258	0.192	7.4	12.5	16	3.8	AS
		2	158	62.5		84	2020-01-24 15:07	4	28	femoral head necrosis	1	Periprosthesis fracture	8.85	177	0.19	10.6	26.14	16	4.5
		1	178	65		57	2020-02-01 18:28	2	8	femoral neck fracture	2	dislocation	6.7	153	0.114	7.5	0.2		1.9
		2	160	55		61	2020-03-06 09:32	2	4 months	femoral neck fracture	2	infection	7.36	283	0.28	9.9	96.35	120	6.2	muscle infection
		2	158	45		68	2020-02-24 08:32	3	4	femoral neck fracture	2	prosthetic loosening	10.2	158	0.133	8.4	99.4	47	5.5
		2	158	60		89	2020-06-01 22:55	3	0.0833	femoral neck fracture	1	dislocation	5	164	0.19	11.5	22.51	35	2.9
		1	158	55		70	2020-05-25 10:37	2	0.0833	femoral head necrosis	1	infection	6.8	445	0.37	8.4	35	29	4.7
		2	155	68		77	2020-04-21 13:04	3	8	femoral neck fracture	2	prosthetic loosening	4.91	198	0.2	10	4	62	3.8
		1	175	92.5		51	2020-04-20 08:14	2	9 days	femoral head necrosis	2	dislocation	9.91	330	0.34	10.2	50	90	4.8
		2	160	55		64	2020-05-17 09:18	3	8	femoral neck fracture	2	infection	7.25	441	0.41	9.2	64.62	110	5.8	S.aureu
		1	166	70		66	2020-04-11 08:38	2	50	right hip disease	2	dislocation	4.5	200	0.166	8.3	3.3	23	3.7
		2	160	65		54	2020-05-12 18:49	3	2	femoral head necrosis	2	Periprosthesis fracture	5.16	301	0.3	9.9	1.79		3.7
		1	170	80		58	2020-07-07 15:16	2	0.25	femoral neck fracture	1	Periprosthesis fracture	7	398	0.19	10.4	23.54	75	3.1	D-D 1.73,PCT0.069
		2	160	85		53	2020-08-21 10:11	2	0.166	femoral head necrosis	1	dislocation	6.1	227	0.23	10.1	11		3.5
							2020-11-17	2	3 months			dislocation	4.17	221	0.25	11.3	8.32	22	3.3
		2	166	60		63	2020-08-16 09:59	2	10	femoral head necrosis	1	prosthetic loosening	4.39	188	0.2	10.9	8	56	3.8
		1	170	81		52	2020-07-23 17:33	2	18	femoral head necrosis	2	prosthetic loosening	8.49	258	0.27	10.3	0.84	4	2.6
		2	156	70		86	2020-08-04 10:58	4	18	femoral head necrosis	2	prosthetic loosening	6.57	232	0.29	12.7	3	12	3
		2	174	70		70	2020-12-11 10:10	2	11	femoral neck fracture	1	prosthetic loosening	10.43	90	0.1	10.9	10.62	15	3.1
		1	160	60		65	2020-10-23 10:16	2	4	femoral head necrosis	2	prosthetic loosening	5.87	202	0.21	10.5	1.18	5	3
		2	157	63		71	2020-11-11 09:38	3	7days	femoral head necrosis	1	Periprosthesis fracture	8.31	146	0.16	10.7	<1	60	3.3
		2	160	55		65	2020-11-21 09:19	3	16	femoral head necrosis	2	prosthetic loosening	7.36	263	0.3	11.6	3	9	2.7
		1	168	70		67	2020-11-22 08:15	3	11	femoral head necrosis	2	prosthetic loosening	7.73	255	0.28	11	8	22	3.5
		2	160	80		76	2020-12-02 08:59	3	6	femoral neck fracture	2	prosthetic loosening	6.01	202	0.2	10	<1	14	2.4
		1	167	63		45	2020-12-04 12:55	2	2	femoral head necrosis	1	prosthesis rupture	4.09	91	0.09	9.9	2.41	25	2.3
		2	153	66		67	2020-12-20 10:21	2	3	femoral head necrosis	1	prosthetic loosening	6.9	252	0.216	8.6	7	25	3
		1	160	60		78	2020-12-24 09:09	2	12	femoral head necrosis	1	prosthetic loosening	7.38	242	0.25	10.4	7	14	3.3
		1	160	70		80	2020-09-22 10:16	3	17	femoral head necrosis	1	prosthetic loosening	8.4	247	0.187	7.6	4.5	13	3.9
		1	165	80		63	2020-09-06 22:59	2	13	DDH	1	Periprosthesis fracture	6.14	160	0.16	10.3	3.31		2.4	D-D 0.82
		1	164	60		70	2020-09-27 09:08	2	12	femoral head necrosis	1	dislocation	7.22	341	0.33	9.7	<1	19	3
		2	155	57		52	2020-09-28 13:37	2	8days	DDH	1	fracture/dislocation	5.22	322	0.31	9.7	<1	22	3.1
		2	161	71.5		67	2020-10-02 09:16	2	3	femoral head necrosis	2	lining wear	5.5	377	0.34	8.9	4	59	3
		2	162	57		66	2020-12-25 22:31	3	11	femoral head necrosis	2	Periprosthesis fracture	9.74	206	0.25	11.9	15.97	35	3.6
		2	158	62.5		84	2020-01-24 15:07	3	28	femoral head necrosis	1	Periprosthesis fracture	8.85	177	0.19	10.6	26.14	16	4.5
		1	165	70		59	2020-09-04 09:17	2	20	femoral head necrosis	1	infection	11.36	523	0.42	8.1	25.77	41	4.1
		1	170	60		58	2020-11-17 12:06	2	8months	femoral head necrosis	1	infection	6.13	350	0.3	8.5	29.58	56	4	Left hip infection was not operated
		2	165	70		46	2020-12-10 14:14	2	5months	Charcot's joint of left elbow	1	Periprosthesis fracture	10.72	307	0.3	9.7	115.8	63	4.4	PCT0.046
		2	168	82.5		76	2021-09-03 15:08	4	8	femoral head necrosis	2	prosthetic loosening,abrasion	5.25	60	0.093	15.5	21.12	27	3.4
		2	160	70		71	2021-10-04 12:40	3	9months	femoral neck fracture	2	prosthetic loosening	6.55	352	0.356	10.1	12.46	10	3.9
		2	164	33		70	2021-10-19 20:07	3	7	femoral neck fracture	1	Periprosthesis fracture	4.87	169	0.17	10.3	12.26		2.9	D-D（FEU）4.83
		1	175	70		66	2021-10-27 13:32	2	16	femoral neck fracture	1	osteolysis/abrasion	4.43	183	0.207	11.3	0.84	1	2.7	PCT0.072
		1	170	65		68	2021-08-30 12:16	2	11days	femoral head necrosis	1	Periprosthesis fracture	8.45	276	0.223	8.1	58.29	106	6.6	PCT0.061
		1	159	62		63	2021-09-06 11:16	3	1.5	femoral head necrosis	2	infection	8.3	292	0.227	7.8	13.94	32	4.6	PCT0.066
		2	152	52		79	2021-10-01 13:08	3	9	femoral head necrosis	2	lining wear	6.42	276	0.275	10	1.15	6	2.8	PCT0.077
							2021-12-29	3	80days		2	dislocation	10.7	278	0.281	10.1	0.97		2.9
		2	166	70		67	2021-10-09 11:17	2	10	femoral head necrosis	1	prosthetic loosening/abrasion	10.04	222	0.232	10.5	1.42	5	3	PCT0.04
		2	160	60		56	2021-07-14 11:09	3	12	femoral head necrosis	2	prosthetic loosening	6.02	215	0.25	11.7	1.48	15	3	lups nephritis
		2	150	45		82	2021-06-23 15:17	4	20days	femoral neck fracture	2	Periprosthesis fracture	4.21	287	0.26	8.9	12.35	24	3.7
		2	162	72.5		75	2021-06-21 08:58	3	5	femoral neck fracture	2	osteolysis	5.25	236	0.25	10.4	4	27	2.9
		2	155	68		78	2021-06-07 11:01	3	20	femoral head necrosis	1	prosthetic loosening	11.2	228	0.198	8.7	0.4	14	3
		2	155	54		57	2021-06-04 11:09	3	3	femoral head necrosis	2	prosthetic loosening	6	311	0.33	10.6	19.03	70	3.5	PCT0.068
		2	150	53		78	2021-03-02 16:34	3	15	femoral neck fracture	2	prosthetic loosening	5.89	286	0.29	10.3	12.9	15	3.7
		1	160	75		57	2021-05-05 10:11	3	20days	DDH	2	dislocation								manual reduction,polio
								3	2months	DDH	2	redislocation	4.22	151	0.15	9.8	1.56	7	2.8
		2	130	50		78	2021-03-21 11:52	3	4	femoral neck fracture	2	acetabular abrasion	5.4	278	0.198	7.1	5.9	64	3.3
		1	168	67		52	2021-05-08 11:27	2	20	femoral head necrosis	1	prosthetic loosening	5.6	193	0.184	9.6	1.4	4	2.6
		2	157	64		72	2021-05-31 11:33	2	12	femoral head necrosis	1	prosthetic loosening	6.5	269	0.27	10	<1	31	3.1
		1	168	83		73	2021-02-16 11:19:00	2	5	femoral neck fracture	1	prosthetic loosening	5.38	246	0.26	10.6	8.05	35	3.9
		2	166	46.5		58	2021-02-16 11:16:00	2	10	femoral head necrosis	2	prosthetic loosening	5.45	200	0.23	11.3	0.42	6	2.9
		2	165	75		67	2021-02-21 11:02	2	13	femoral head necrosis	2	infection、prosthetic loosening	7.9	398	0.298	7.5	23.5	102	4.5
		2	164	62		78	2021-01-16 21:54	3	9	femoral neck fracture	2	dislocation	2.4	63	0.057	9	0.1		2.1	manual reduction
		2	152	55		57	2021-03-23 15:18	2	9months	elbow arthritis	2	prosthetic loosening	6.32	300	0.29	9.6	1.88	26	3.6
		1	178	90		33	2021-01-26 11:28		1month	femoral head necrosis	2	poor wound healing	8.8	385	0.269	7	20.6	11		PCT0.176，S.aureu
		1	165	60		65	2021-04-18 11:42		20days	femoral head necrosis	2	infection？	5.75	287	0.28	9.8	95.29	82	4.8	PCT0.208
		2	150	45		45	2021-05-25 14:48	2	1month	DDH	1	dislocation	5.1	244	0.211	8.7	5			PCT0.125,manual reduction
		2	158	55		67	2021-11-14 18:53	3	1	femoral neck fracture	2	dislocation	9.71	501	0.436	8.7	91.3	80	7.9
		2	155	50		84	2021-10-10 09:49	3	1month	femoral neck fracture	2	infection	5.12	92	0.085	93	28.12	20	4.4	PCT0.114
								3	2months after revision			dislocation	4.54	127	0.121	9.5			3.2
		2	160	62.5		76	2021-11-02 15:12	3	0.5	femoral neck fracture	2	Periprosthesis fracture	6.27	277	0.277	10	12.79		4.1	D-D（FEU）0.88，IL-6(6.67)，PCT0.054
		2	160	65		68	2021-11-22 11:34	2	12	femoral head necrosis	1	prosthetic loosening	7.56	231	0.203	8.8	4.81	16	3.6
		2	155	70		66	2021-11-26 17:02	2	8	femoral neck fracture	2	infection	7.41	348	0.283	8.1	24.96	61	5	S.aureu
		2	161	70		81	2021-12-04 11:31	3	17	femoral head necrosis	2	prosthetic loosening	6.14	262	0.233	8.9	80.18	41	5.6	PCT0.133
		1	168	70		56	2019-12-22 08:30	2	0.166		1	infection of incisional wound	9.1	326	0.32	9.7	50	52	6.9		6.9
		2	160	75		72	2021-12-15 10:57	3	11	femoral head necrosis	1	prosthetic loosening	7.44	208	0.265	12.7	3.21	7	4.2	PCT0.02
		1	168	60		73	2021-12-28 09:37		11	femoral head necrosis	2	prosthetic loosening	5.69	180	0.214	11.9	10.78	7	4.5
		2	165	84		70	2021-12-24 15:29	2	10	femoral neck fracture	2	prosthetic loosening	6.58	142	0.157	11	24.08		3.2	D-D（FEU），1.13（0-0.5）

## Sheet: Annotation
Sex	Male	1
	Female	2
Side	Left	1
	Right	2
	Bilateral	3
	Ankylosing Spondylitis	AS
	Procalcitonin	PCT
	Developmental Dysplasia of the Hip	DDH
